# Supplementary material for: Cyclopentadithiophene-benzoic acid copolymers as conductive binders for silicon nanoparticles in anode electrodes of lithium ion batteries
Source: Royal Society of Chemistry journal article supplement (doi:10.1039/c6cc08177k), 2017-01-01
Supplement: c6cc08177k2.pdf [file c6cc08177k2.pdf]

**Supporting Information for**  
**Cyclopentadithiophene-Benzoic Acid Copolymers**  
**as Conductive Binders for Silicon Nanoparticles**  
**in Anode Electrode of Lithium Ion Batteries**

Kuo-Lung Wang<sup>a</sup>, Tzu-Husan Kuo<sup>a</sup>, Chun-Feng Yao<sup>a</sup>, Shu-Wei Chang<sup>a</sup>,  
Yu-Shuo Yang<sup>b</sup>, Hsin-Kai Huang<sup>b</sup>, Cho-Jen Tsai<sup>b\*</sup>, Masaki Horie<sup>a\*</sup>

<sup>a</sup> Department of Chemical Engineering, National Tsing-Hua University, 101, Section  
2, Kuang-Fu Road, Hsinchu, 30013 Taiwan

<sup>b</sup> Department of Material Science, National Tsing-Hua University, 101, Section 2,  
Kuang-Fu Road, Hsinchu, 30013 Taiwan

E-mail: mhorie@mx.nthu.edu.tw

**Contents**

1. General methods and synthesis of polymers
2. <sup>1</sup>H NMR spectrum
3. Optical and electrochemical properties
4. Battery fabrication and measurements
5. DC conductivity test

# 1. General methods and synthesis of compounds

## 1.1 General methods

Methyl-2,5-dibromobenzoate, Pd(OAc)<sub>2</sub> and pivalic acid were purchased from Sigma-Aldrich and used without further purification. 4,4-Bis(2-ethylhexyl)-4*H*-cyclopenta[2,1-*b*;3,4-*b'*]dithiophene was synthesised by modification of established procedures.<sup>S1</sup> Synthesis was performed under a nitrogen atmosphere using standard Schlenk techniques. <sup>1</sup>H NMR spectra were obtained using a Bruker 500 MHz spectrometer. Polymer molecular weight was determined by GPC in tetrahydrofuran (THF) solution using a JASCO 880-PU pump and JASCO 870-UV/VIS detector (referenced to polystyrene standards). UV-Vis absorption spectra were recorded on a JASCO U-670 UV-Vis spectrophotometer. CV was performed at 0.10 V s<sup>-1</sup> in a DY2300 electrochemical analyzer with a three-electrode cell, Ag/AgCl as reference electrode, platinum wire as counter electrode and platinum plate as the working electrode in nitrogen-purged anhydrous 0.10 M tetrabutylammonium hexafluorophosphate acetonitrile solution at room temperature. Onsets of oxidation and reduction peak potentials were used in the calculation of HOMO and LUMO energy levels.

S1. P. Coppo and M. L. Turner, *J. Mater. Chem.*, 2005, **15**, 1123.

## 1.2 Synthesis of P(CPDT-MB) by direct arylation polymerization

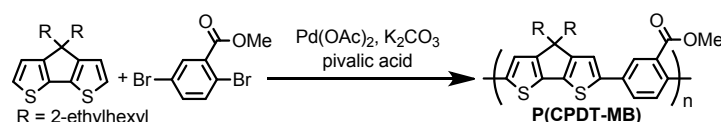

Reaction conditions are summarized in Table S1. Typical reaction conditions (entry 12) are described as follows. Anhydrous pivalic acid (3.8 mg, 0.037 mmol), potassium carbonate (42.8 mg, 0.31 mmol), and catalyst Pd(OAc)<sub>2</sub> (0.012 mmol, 2.8 mg, 0.1 eq.) was added to a solution of monomers CPDT (50.0 mg, 0.124 mmol) and methyl-2,5-dibromobenzoate (36.5 mg, 0.124 mmol) in anhydrous *N*-methylpyrrolidone (NMP) (1.24 mL) in a 10 mL Schlenk tube. The solution was purged with nitrogen gas for 5 min, then the mixture was stirred at 80 °C for 8 h. After polymerisation, the resulting mixture was precipitated into 100 ml methanol. The precipitate was collected by vacuum filtration and then washed by Soxhlet extraction with ethanol and methylethylketone and extracted into chloroform. The chloroform fraction was concentrated under reduced pressure and reprecipitated into methanol. The precipitate was collected using centrifugation at 5000 rpm for 4 min and dried in vacuum to obtain a dark orange powder (451 mg, 85% yield and 281 mg, 53% yield

after Soxhlet extraction).  $^1\text{H}$  NMR (500 MHz,  $\text{CDCl}_3$ ):  $\delta$  6.966, 7.01, and 7.27 (s, 2H, 3-cyclopentadithiophene), 7.48 (s,  $^1\text{H}$ , aromatic), 7.67 (s,  $^1\text{H}$ , aromatic), 7.87 (s,  $^1\text{H}$ , aromatic), 3.81 (s, 3H,  $\text{OCH}_3$ ), 1.92 (br, 4H,  $\text{CH}_2$ ). GPC (polystyrene standards in THF):  $M_n = 53,000$ ,  $M_w/M_n = 2.59$ . UV-vis:  $\lambda_{\text{max}} = 465$  nm in THF,  $\lambda_{\text{max}} = 467$  nm in film.

**Table S1.** Reaction conditions for direct arylation polymerization <sup>a</sup>

| Entry | Solvent         | Temp. (°C) | Time (h) | $\text{Pd}(\text{OAc})_2$ (eq) | $M_n^b$          | $M_w/M_n^b$    | Yield <sup>c</sup> (%) |
|-------|-----------------|------------|----------|--------------------------------|------------------|----------------|------------------------|
| 1     | NMP             | 80         | 10       | 0.01                           | 1500             | 1.35           | 8                      |
| 2     | NMP             | 100        | 10       | 0.01                           | 1900             | 1.23           | 10                     |
| 3     | NMP             | 80         | 20       | 0.01                           | 990              | 1.22           | 9                      |
| 4     | NMP             | 100        | 20       | 0.01                           | 1300             | 1.26           | 10                     |
| 5     | NMP             | 80         | 10       | 0.1                            | 2500             | 1.74           | 51                     |
| 6     | NMP             | 100        | 10       | 0.1                            | 6900             | 2.36           | 85                     |
| 7     | NMP             | 80         | 20       | 0.1                            | 7800             | 2.72           | 80                     |
| 8     | NMP             | 100        | 20       | 0.1                            | 4800             | 1.97           | 45                     |
| 9     | NMP             | 90         | 20       | 0.1                            | 7400<br>(11400)  | 2.32<br>(2.44) | 80<br>(44)             |
| 10    | DMAc            | 80         | 20       | 0.1                            | 16600            | 2.68           | 9                      |
| 11    | DMAc<br>(anhy.) | 80         | 20       | 0.1                            | 62300            | 2.58           | 79<br>(3)              |
| 12    | NMP<br>(anhy.)  | 80         | 8        | 0.1                            | 40000<br>(53000) | 3.27<br>(2.59) | 85<br>(53)             |

<sup>a</sup> Reactions were carried out in the presence of anhydrous pivalic acid (0.3 eq.) and  $\text{K}_2\text{CO}_3$  (2.5 eq.) and 0.1M monomer concentration. <sup>b</sup> Calculated from gel permeation chromatography (GPC) measurements carried out using THF as the solvent and calibrated by polystyrene standards.  $M_n$  and  $M_w/M_n$  after Soxhlet extraction is noted in brackets. <sup>c</sup> Yield after Soxhlet extraction is noted in brackets.

### 1.3 Synthesis of P(CPDT-B) by saponification

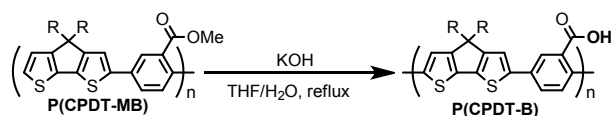

A mixture of P(CPDT-MB) (Entry 12 in Table S1) (100 mg) and KOH (581 mg) in a mixed solution ( $\text{THF}:\text{H}_2\text{O} = 10:1$ , 6.6 mL) was refluxed for 48 hours under a nitrogen atmosphere. After the reaction, the solution was concentrated in vacuum and the polymer was precipitated into water. Then, the polymer was suspended in 37% HCl aqueous solution and stirred at reflux temperature for 12 hours. The resulting polymer was filtered, washed with water and dried in vacuum to obtain dark orange powder (99.5 mg, 99% yield). GPC (polystyrene standards in THF):  $M_n = 17,000$ ,  $M_w/M_n = 3.32$ . UV-vis:  $\lambda_{\text{max}} = 471$  nm in THF,  $\lambda_{\text{max}} = 477$  nm in film.

## 2. $^1\text{H}$ NMR spectrum

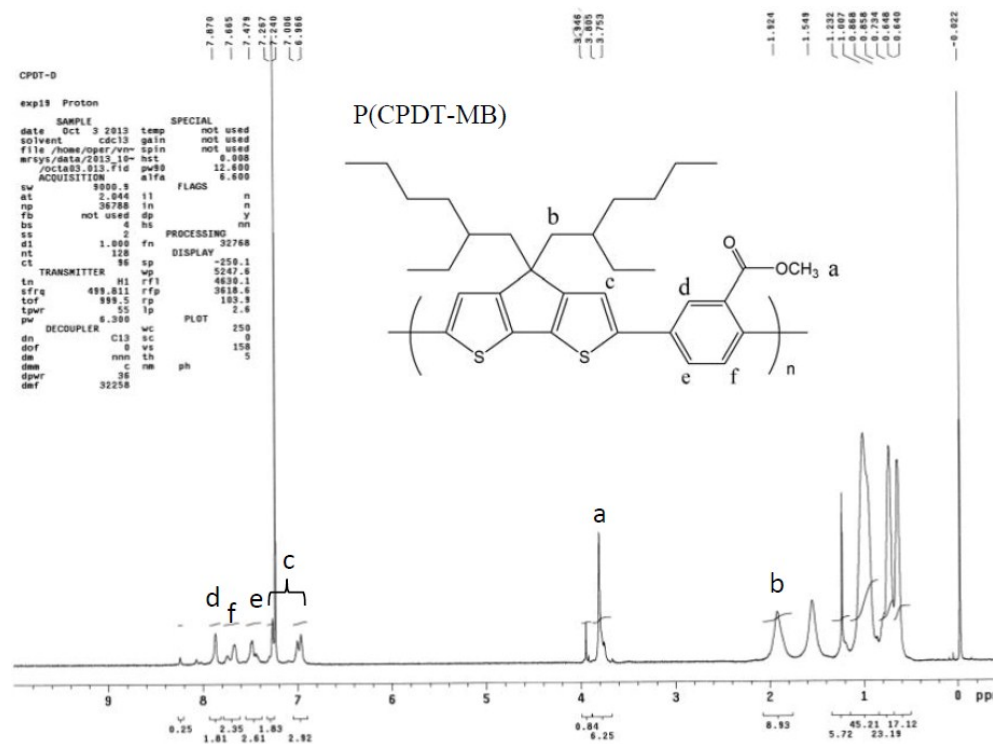

**Figure S1.**  $^1\text{H}$  NMR spectrum (500 MHz,  $\text{CDCl}_3$ ) of P(CPDT-MB).

### 3. Optical and electrochemical properties

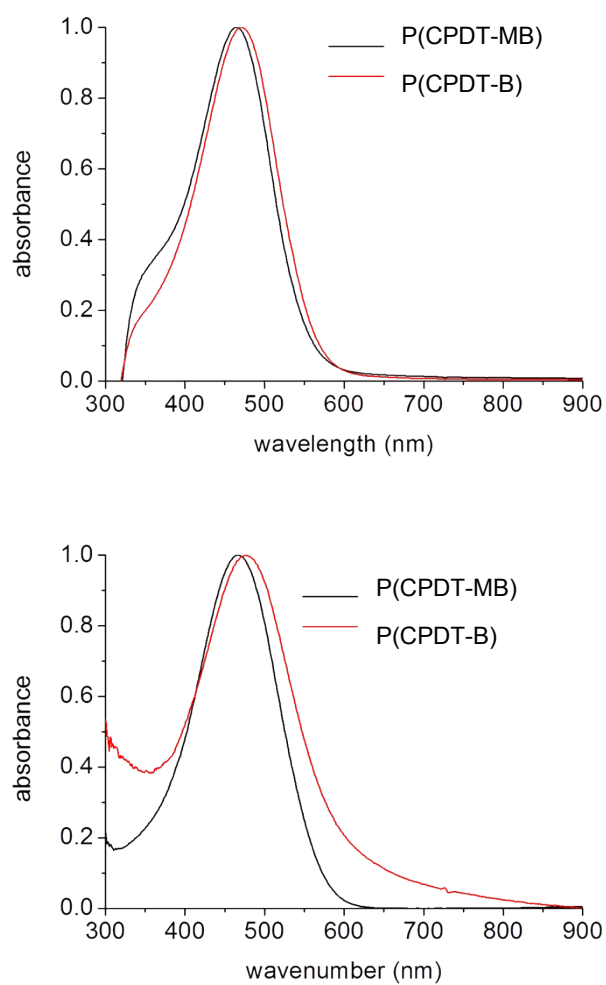

**Figure S2.** UV-vis absorption spectra of P(CPDT-MB) and P(CPDT-B) in THF solutions (top) and films (bottom).

**Table S2.** Optical and electrochemical properties of polymers.

| Polymer    | $\lambda_{\text{max}}/\text{nm}$ |         | $E_{\text{pa}}/\text{V}$ vs<br>AgCl/Ag |
|------------|----------------------------------|---------|----------------------------------------|
|            | in THF                           | in film |                                        |
| P(CPDT-MB) | 465                              | 467     | 1.61                                   |
| P(CPDT-B)  | 471                              | 477     | 1.73                                   |

## 4. Battery fabrication and measurements

### 4.1 Preparation of electrodes

Nano-silicon powder (Alfa aesar, particle diameter  $\leq 50$  nm, specific surface area 70-80 m<sup>2</sup>/g) was used as active material for anodes, and the conjugated polymers, P(CPDT-MB) and P(CPDT-B), were used as conductive binders. In the process of fabrication, the conductive binders were dissolved in THF. The conductive binder and nano-silicon powder (weight ratio = 1:2) were mixed in 4 mL sample bottle with adequate solvent stirred in Planetary Centrifugal Mixer (Thinky Mixer ARM-310) to obtain well-mixed slurry. The resulting slurry was used to coat copper foil using 100  $\mu$ m blade with 8 V constant speed by home-made doctor blade. Then, the electrode film was dried in vacuum oven at 110 °C for 8 h.

### 4.2 Trimming of electrode sheets

The resulting electrode film was cut into several rounded films with 13 mm diameter using a cutting machine (P1300-A, UBIQ). Then, the rounded electrode films were weighed to calculate the weight and density. Loading of the electrode films is in a range of 0.6-0.7 mg/cm<sup>2</sup>.

### 4.3 Assembly of batteries

All half coin cells (CR2032, width: 20 mm, height: 32 mm) were assembled in the glove box (UNILAB-B, MBraun) under argon atmosphere (H<sub>2</sub>O value < 1 ppm, O<sub>2</sub> value < 5 ppm), and sealed by a capping machine (C2000-A, UBIQ). The half coin cells are composed of front cover, reed, spacer, lithium metal, separator, electrode sheet and back cover (ordering from top to bottom). The electrolyte contains 1:1 volume ratio of EC (ethylene carbonate, Alfa aesar) and DEC (diethyl carbonate, Alfa aesar).

### 4.4 Cycle life test of lithium ion batteries

The half coin cells were measured at constant current mode by charging/discharging machine (BAT-750B). The charging/discharging rates at 0.1, 0.2, 0.5, 1.0 and 2.0 C correspond to 360, 720, 1800, 3600 and 7200 mA/g, respectively. The first cycle was measured at 0.1 C for activating all internal silicon. The cut-off voltages of discharge and charge were set at 0.01 V and 1.5 V, respectively. The results of cycle life test are summarized in Fig. 4 (all specific capacities were calculated based on total weight of anode of electrode). The columbic efficiencies were also tested and shown in Fig. S3. The battery fabricated from P(CPDT-B) shows stable efficiency around 100% even after 60 cycles, whereas P(CPDT-MB) is quickly degraded.

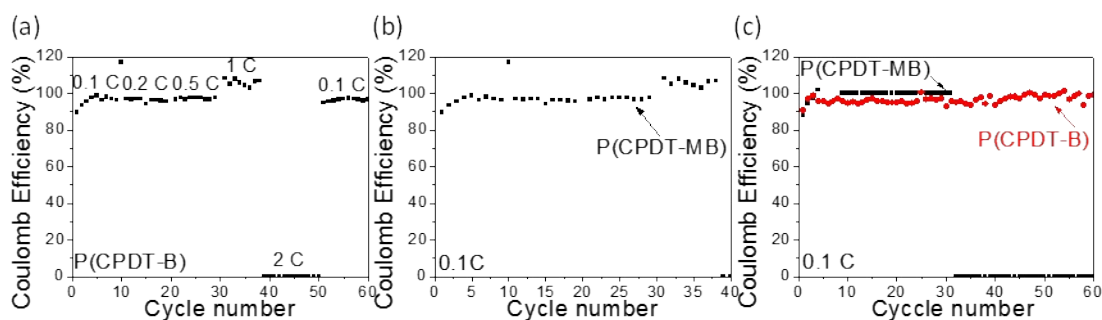

**Figure S3.** Coulombic efficiencies of lithium ion batteries at various Coulomb rates for (a) P(CPDT-B) and (b) P(CPDT-MB). (c) Coulombic efficiencies of lithium ion batteries at a constant rate at 0.1 C.

#### 4.5 Electrochemical impedance analysis

The impedance measurements were carried out using VSP Bio-logic with a frequency range of 0.01-100000 Hz. The equivalent circuit model (Figure S4) was applied to simulate the resistance and ionic conductivity of the polymers, where R1 and R2 are the resistance of electrolyte and charge transfer, respectively. The ionic conductivity was calculated by the following formula:  $\sigma = (1/R) \times (d/S)$ . The charge transfer resistance  $R$  was calibrated by EC-Lab software.

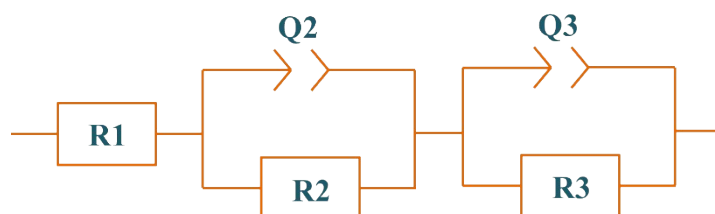

**Figure S4.** Equivalent circuit model for the electrochemical impedance analysis

## 5. DC conductivity test

Polymer films were prepared by a drop casting method, in which THF solution of the polymer was casted between two copper plates on a glass substrate and dried in vacuum. The electric resistance was measured using DY2300 electrochemical analyzer with a scan rate of  $1 \text{ V s}^{-1}$ , as shown in Fig. S5. The electrical conductivity  $\sigma'$  was calculated from the equation:

$$\sigma' = (1/R') \times (L/A)$$

where  $R'$ ,  $A$  and  $L$  are resistance, area of the polymer film and length between two electrodes, respectively.

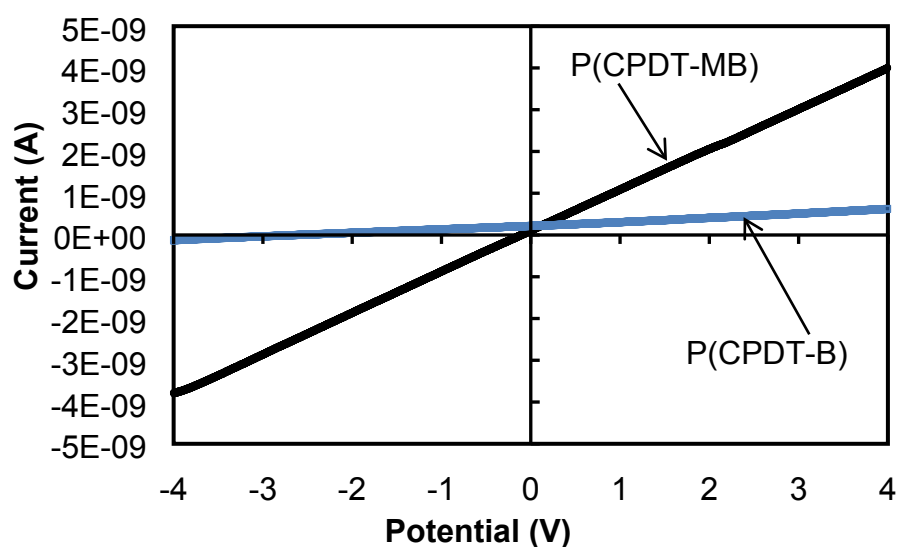

**Figure S5.** DC resistance tests of films of P(CPDT-MB) and P(CPDT-B)

**Table S3.** Results of DC measurement

| Polymer    | Electric resistance ( $\text{S}^{-1}$ ) | Electric conductivity ( $\text{S cm}^{-1}$ ) |
|------------|-----------------------------------------|----------------------------------------------|
| P(CPDT-MB) | $1.0 \times 10^9$                       | $2.1 \times 10^{-8}$                         |
| P(CPDT-B)  | $1.1 \times 10^{10}$                    | $3.1 \times 10^{-9}$                         |
